# Supplementary material for: FXR Signaling-Mediated Bile Acid Metabolism Is Critical for Alleviation of Cholesterol Gallstones by Lactobacillus Strains
Source: PubMed Central journal article supplement (PMC9603329; doi:10.1128/spectrum.00518-22), 2022-08-29
Supplement: spectrum.00518-22-s0001.pdf [file spectrum.00518-22-s0001.pdf]

## Supplementary Information

This supplementary information includes supplementary materials and methods, six supplementary figures and three supplementary table.

## Supplementary Method

### *Oral Glucose Tolerance Test (OGTT)*

After 6 h of food deprivation, the mice were orally administered a dose of 2.0 g/kg body weight glucose. Blood samples were collected from the tail at 0, 15, 30, 60 and 120 min after glucose administration, and blood glucose levels were measured with a blood glucose meter (Accu Check; Roche Diagnostics, Mannheim, Germany).

## Supplementary Figures

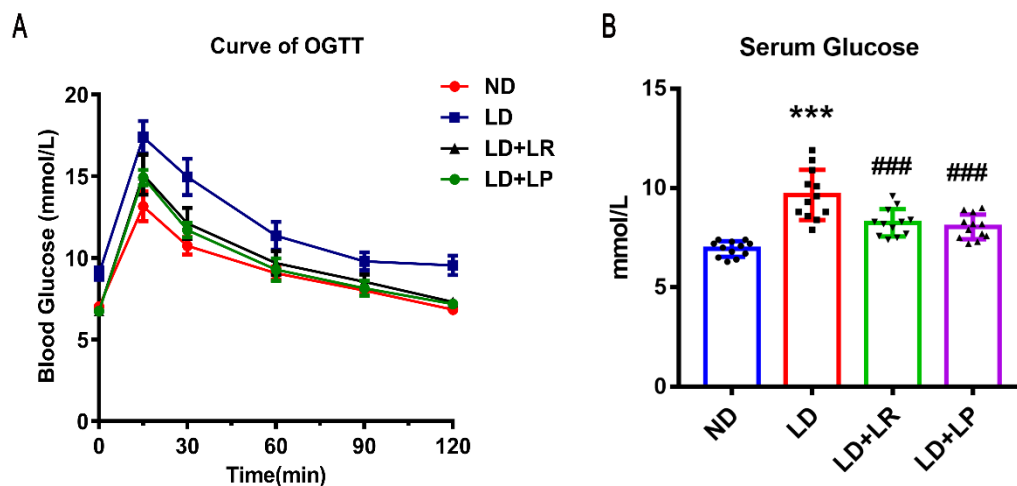

**Supplementary Figure 1** LR and LP Treatments Reduced Glucose Metabolism Disorders in LD-fed Mice.

(A) OGTT curve. (B) Serum glucose was determined by a SIEMENS fast automatic

biochemical analyzer (ADVIA 2400). Data were analyzed by ANOVA along with a post-hoc Tukey's test and presented as the mean  $\pm$  SEM (n = 12), \* 0.01 < P  $\leq$  0.05, \*\* 0.001 < P  $\leq$  0.01, \*\*\* P  $\leq$  0.001 vs ND, # 0.01 < P  $\leq$  0.05, ## 0.001 < P  $\leq$  0.01, ### P  $\leq$  0.001 vs LD.

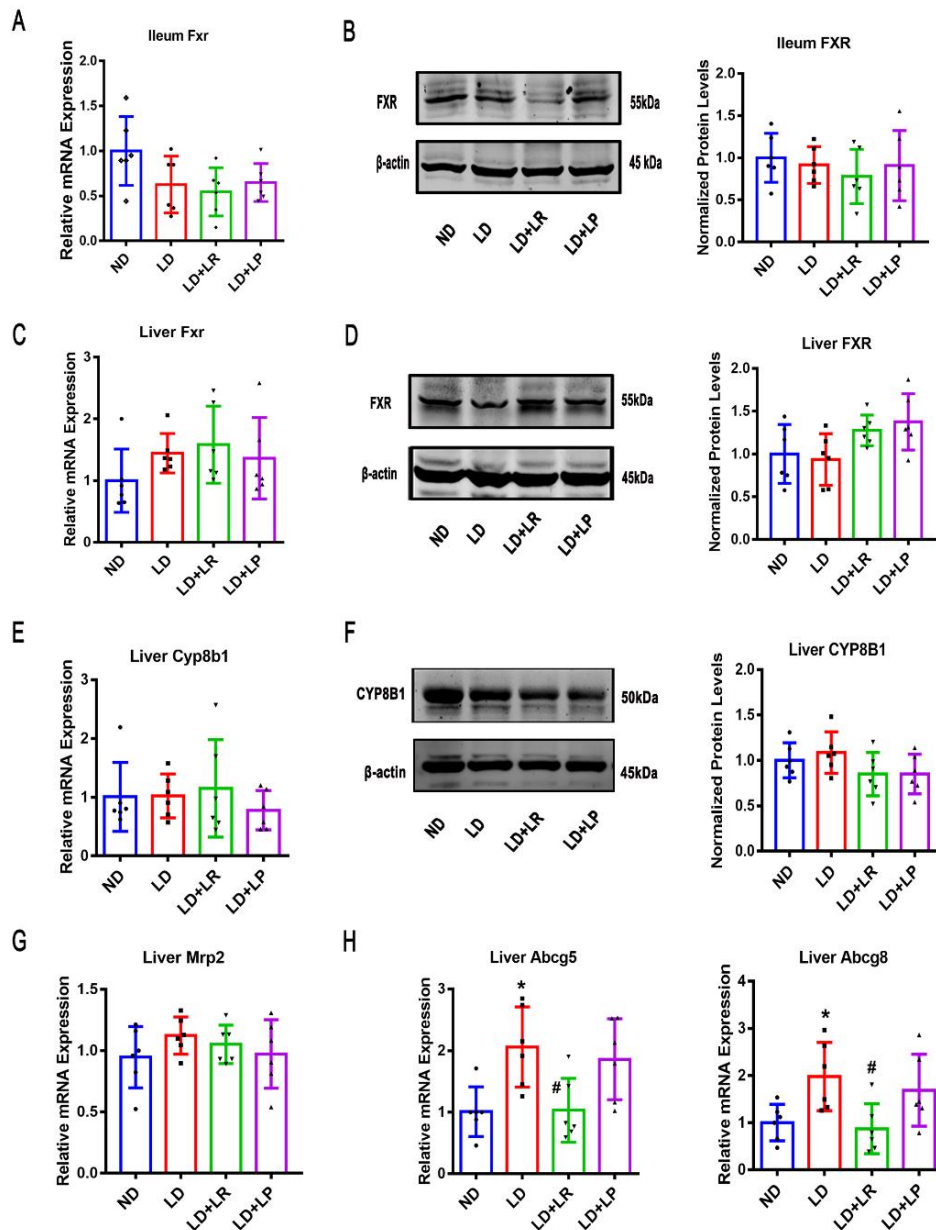

**Supplementary Figure 2 LR and LP Treatments Activated FXR Signaling Pathway**

**and Cholesterol Transportation.**

(A) Ileal mRNA expression of Fxr. (B) Protein expression and quantification of ileal FXR. (C) Hepatic mRNA expression of Fxr. (D) Protein expression and quantification of Hepatic FXR. (E) Hepatic mRNA expression of Cyp8b1. (F) Protein expression and quantification of Hepatic CYP8B1. (G-H) Hepatic mRNA expression of Mrp2, Abcg5, Abcg8. Data were analyzed by ANOVA along with a post-hoc Tukey's test and presented as the mean  $\pm$  SEM (n=6), \*  $0.01 < P \leq 0.05$ , \*\*  $0.001 < P \leq 0.01$ , \*\*\*  $P \leq 0.001$  vs ND, #  $0.01 < P \leq 0.05$ , ##  $0.001 < P \leq 0.01$ , ###  $P \leq 0.001$  vs LD.

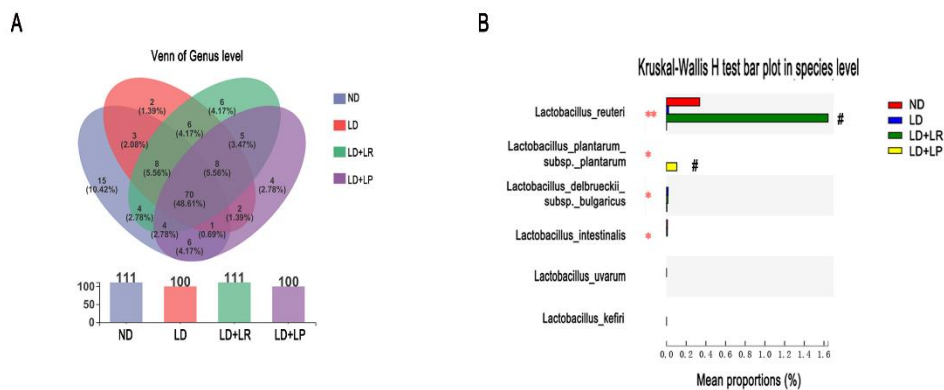

**Supplementary Figure 3 LR and LP Treatments Changed the CGS-associated Gut Microbiota Composition in LD-fed Mice.**

(A) Venn diagram of gut microbiota at the genus level modulated by the two probiotics LR and LP. (B) Comparison of different species of *Lactobacillus* abundance in the ND, LD, LD+LR and LD+LP groups by Kruskal-Wallis H test with the post-hoc (Tukey-Kramer) analysis. (n=5, #  $0.01 < P \leq 0.05$ , ##  $0.001 < P \leq 0.01$ , ###  $P \leq 0.001$  vs LD. The red \* in figure 4F showed statistically significant differences between the groups

by Kruskal-Wallis H test. \*  $0.01 < P \leq 0.05$ , \*\*  $0.001 < P \leq 0.01$ , \*\*\*  $P \leq 0.001$ ).

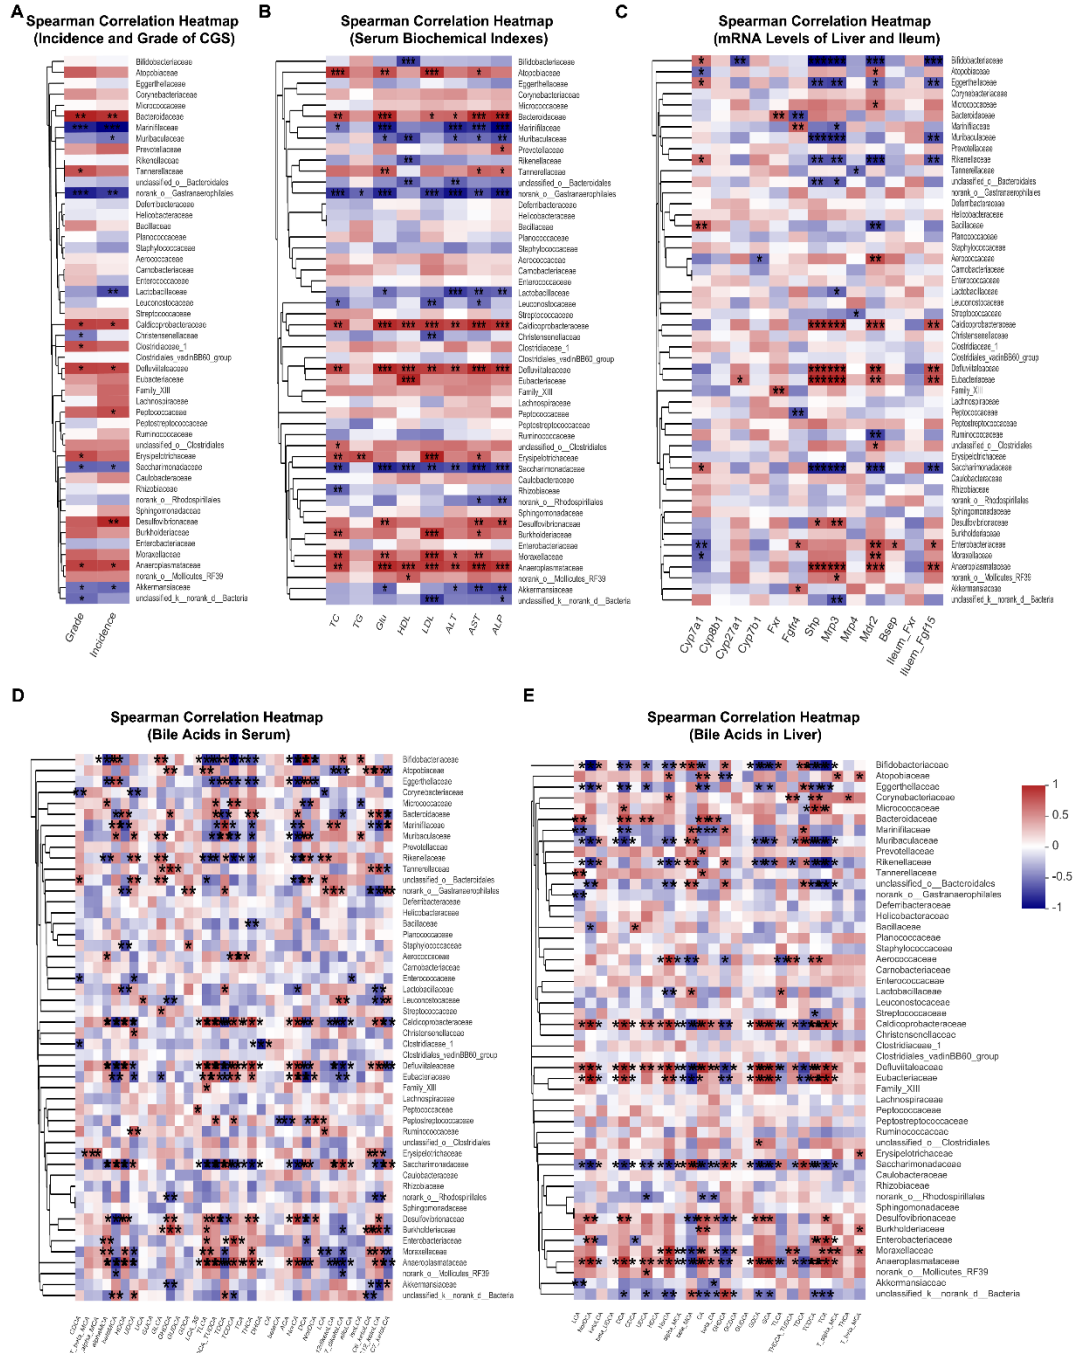

**Supplementary Figure 4 Correlation between Gut Microbiota and Host CGS-related Parameters.**

(A) Spearman's correlation analysis was performed between the top 50 most abundant

families and the incidence and grade of CGS. (B) Spearman's correlation analysis was performed between the top 50 most abundant families and serum AST, ALT, ALP, TG, TC, HDL, LDL and glucose (Glu). (C) Spearman's correlation analysis was performed between the top 50 most abundant families and the mRNA levels of liver Cyp7a1, Cyp8b1, Cyp7b1, Cyp 27a1, Mdr2, Mrp3, Mrp4, Bsep, Shp, Fxr, and Fgfr4 and ileum Fxr, Fgf15, and Shp. (D) Spearman's correlation analysis was performed between the top 50 most abundant family levels and 35 kinds of BAs in the serum of mice. (E) Spearman's correlation analysis was performed between the top 50 most abundant family levels and 26 kinds of BAs in the livers of mice. Red and blue denote positive and negative associations, respectively. Red and blue denote positive and negative associations, respectively. (\*  $0.01 < P \leq 0.05$ , \*\*  $0.001 < P \leq 0.01$ , \*\*\*  $P \leq 0.001$ ,  $|R| \geq 0.5$ ).

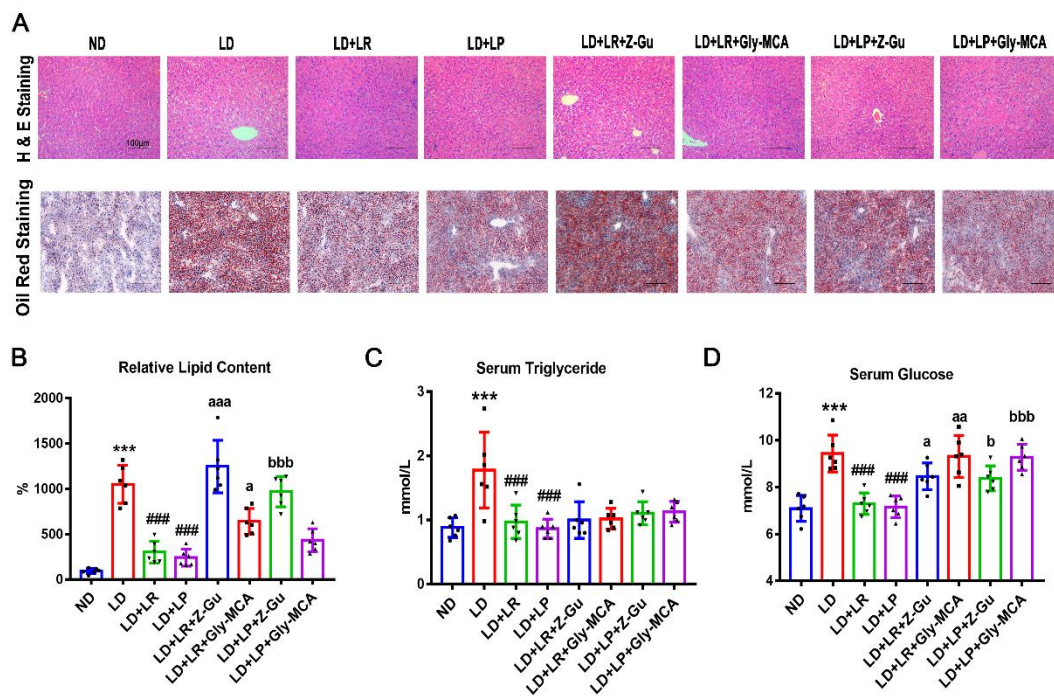

**Supplementary Figure 5 The FXR Inhibitor Blocked the Improvements of Hepatic Steatosis and Serum Glucose Disorder Induced by LR and LP.**

(A) Representative images of H&E-stained and Oil red O-stained liver sections ( $\times 200$ )

(B) Percentage of Oil Red O positive area. (C) Serum triglyceride and glucose was

determined by a SIEMENS fast automatic biochemical analyzer (ADVIA 2400). Data

were analyzed by ANOVA along with a post-hoc Tukey's test and presented as the

mean  $\pm$  SEM (n=6), \*  $0.01 < P \leq 0.05$ , \*\*  $0.001 < P \leq 0.01$ , \*\*\*  $P \leq 0.001$  vs ND, #

$0.01 < P \leq 0.05$ , ##  $0.001 < P \leq 0.01$ , ###  $P \leq 0.001$  vs LD, **a**  $0.01 < P \leq 0.05$ , **aa**  $0.001$

$< P \leq 0.01$ , **aaa**  $P \leq 0.001$  vs LD+LR, **b**  $0.01 < P \leq 0.05$ , **bb**  $0.001 < P \leq 0.01$ , **bbb**  $P$

$\leq 0.001$  vs LD+LP.

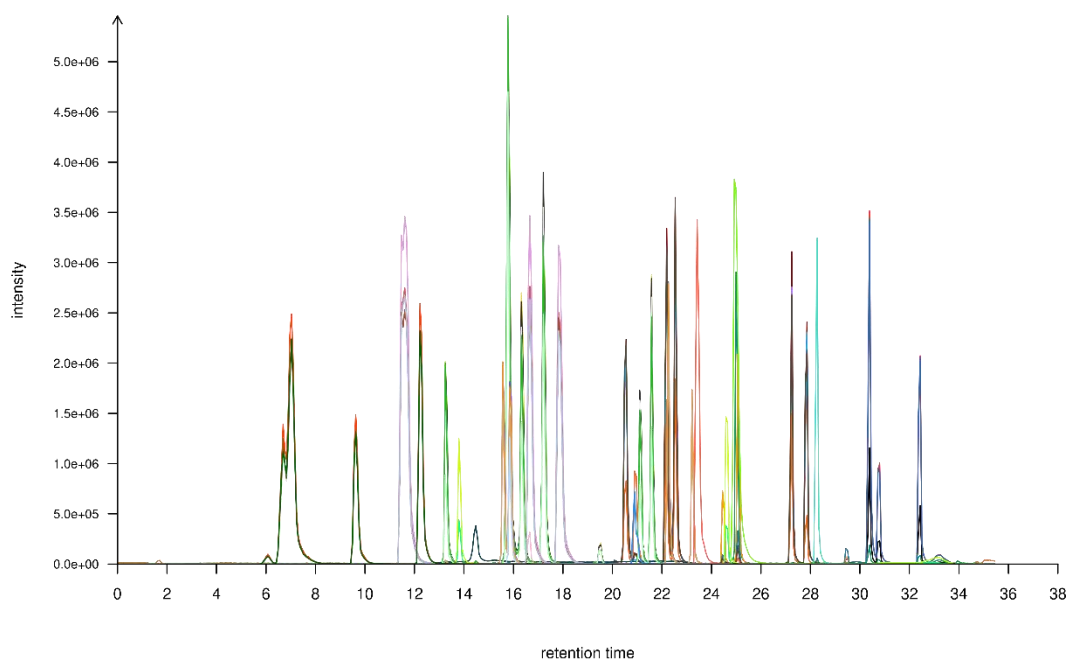

**Supplementary Figure 6 The Total Ion Chromatography (TIC) of Working Standard**

**Solutions.**

**Supplementary Table 1 PCR Genes Primers Sequences**

| <b>Gene<br/>(mouse)</b> |         | <b>Primer sequences</b>          |  |
|-------------------------|---------|----------------------------------|--|
| Mrp2                    | Forward | 5'- GCTTCCCATGGTGATCTCTT -3'     |  |
|                         | Reverse | 5'- ATCATCGCTTCCCAGGTACT -3'     |  |
| Abcg5                   | Forward | 5'- AGACGTTGCGATACACAGCGATG -3'  |  |
|                         | Reverse | 5'- GTGCCACAGAACACCAACTCTCC -3'  |  |
| Abcg8                   | Forward | 5'- CTCGTGTGGTTGGTGGTCTTCTG -3'  |  |
|                         | Reverse | 5'- GCCGTAGCTGATGCCGATGAC -3'    |  |
| Fxr                     | Forward | 5'- AGCATTACCAAGAACGCCGTGTAC -3' |  |
|                         | Reverse | 5'- GCTGTCGTCCTCATTAGCTGTCTG -3' |  |
| Cyp8b1                  | Forward | 5'- GGCAAGAAGATCCACCACTACAGC -3' |  |
|                         | Reverse | 5'- TCAGGCGATAGAGGAAGCGTACC-3'   |  |

**Supplementary Table 2 Standard Curve Concentration of Each Bile Acid**

| Name<br>(ng/mL) | Cal1 | Cal2 | Cal3 | Cal4 | Cal5 | Cal6  | Cal7 | Cal8 | Cal9  | Cal10 |
|-----------------|------|------|------|------|------|-------|------|------|-------|-------|
| alloLCA         | 800  | 400  | 200  | 100  | 50   | 25    | 10   | 5    | 2.5   | 1     |
| LCA             | 400  | 200  | 100  | 50   | 25   | 12.5  | 5    | 2.5  | 1.25  | 0.5   |
| isoLCA          | 400  | 200  | 100  | 50   | 25   | 12.5  | 5    | 2.5  | 1.25  | 0.5   |
| NorDCA          | 200  | 100  | 50   | 25   | 12.5 | 6.25  | 2.5  | 1.25 | 0.625 | 0.25  |
| 6-ketoLCA       | 800  | 400  | 200  | 100  | 50   | 25    | 10   | 5    | 2.5   | 1     |
| 12-ketoLCA      | 1000 | 500  | 250  | 125  | 62.5 | 31.25 | 12.5 | 6.25 | 3.125 | 1.25  |

|                    |      |      |     |     |      |       |      |      |       |      |
|--------------------|------|------|-----|-----|------|-------|------|------|-------|------|
| 7-ketoLCA          | 200  | 100  | 50  | 25  | 12.5 | 6.25  | 2.5  | 1.25 | 0.625 | 0.25 |
| $\beta$ -UDCA      | 400  | 200  | 100 | 50  | 25   | 12.5  | 5    | 2.5  | 1.25  | 0.5  |
| DCA                | 400  | 200  | 100 | 50  | 25   | 12.5  | 5    | 2.5  | 1.25  | 0.5  |
| CDCA               | 400  | 200  | 100 | 50  | 25   | 12.5  | 5    | 2.5  | 1.25  | 0.5  |
| UDCA               | 200  | 100  | 50  | 25  | 12.5 | 6.25  | 2.5  | 1.25 | 0.625 | 0.25 |
| HDCA               | 1000 | 500  | 250 | 125 | 62.5 | 31.25 | 12.5 | 6.25 | 3.125 | 1.25 |
| NorCA              | 800  | 400  | 200 | 100 | 50   | 25    | 10   | 5    | 2.5   | 1    |
| DHCA               | 800  | 400  | 200 | 100 | 50   | 25    | 10   | 5    | 2.5   | 1    |
| 7,12-diketo<br>LCA | 800  | 400  | 200 | 100 | 50   | 25    | 10   | 5    | 2.5   | 1    |
| 6,7-diketo<br>LCA  | 800  | 400  | 200 | 100 | 50   | 25    | 10   | 5    | 2.5   | 1    |
| $\alpha$ -MCA      | 1000 | 500  | 250 | 125 | 62.5 | 31.25 | 12.5 | 6.25 | 3.125 | 1.25 |
| UCA                | 200  | 100  | 50  | 25  | 12.5 | 6.25  | 2.5  | 1.25 | 0.625 | 0.25 |
| $\beta$ -MCA       | 1000 | 500  | 250 | 125 | 62.5 | 31.25 | 12.5 | 6.25 | 3.125 | 1.25 |
| CA                 | 400  | 200  | 100 | 50  | 25   | 12.5  | 5    | 2.5  | 1.25  | 0.5  |
| ACA                | 200  | 100  | 50  | 25  | 12.5 | 6.25  | 2.5  | 1.25 | 0.625 | 0.25 |
| $\beta$ CA         | 2000 | 1000 | 500 | 250 | 125  | 62.5  | 25   | 12.5 | 6.25  | 2.5  |
| GLCA               | 800  | 400  | 200 | 100 | 50   | 25    | 10   | 5    | 2.5   | 1    |
| GHDCA              | 800  | 400  | 200 | 100 | 50   | 25    | 10   | 5    | 2.5   | 1    |
| GCDCA              | 1000 | 500  | 250 | 125 | 62.5 | 31.25 | 12.5 | 6.25 | 3.125 | 1.25 |
| GUDCA              | 800  | 400  | 200 | 100 | 50   | 25    | 10   | 5    | 2.5   | 1    |
| GDCA               | 800  | 400  | 200 | 100 | 50   | 25    | 10   | 5    | 2.5   | 1    |
| LCA-3S             | 800  | 400  | 200 | 100 | 50   | 25    | 10   | 5    | 2.5   | 1    |
| GCA                | 1000 | 500  | 250 | 125 | 62.5 | 31.25 | 12.5 | 6.25 | 3.125 | 1.25 |



|                  |      |      |     |     |      |       |      |      |       |      |
|------------------|------|------|-----|-----|------|-------|------|------|-------|------|
| TLCA             | 800  | 400  | 200 | 100 | 50   | 25    | 10   | 5    | 2.5   | 1    |
| THDCA            | 2000 | 1000 | 500 | 250 | 125  | 62.5  | 25   | 12.5 | 6.25  | 2.5  |
| TUDCA            | 2000 | 1000 | 500 | 250 | 125  | 62.5  | 25   | 12.5 | 6.25  | 2.5  |
| TDCA             | 1000 | 500  | 250 | 125 | 62.5 | 31.25 | 12.5 | 6.25 | 3.125 | 1.25 |
| TCDCa            | 1000 | 500  | 250 | 125 | 62.5 | 31.25 | 12.5 | 6.25 | 3.125 | 1.25 |
| TCA              | 1000 | 500  | 250 | 125 | 62.5 | 31.25 | 12.5 | 6.25 | 3.125 | 1.25 |
| T- $\alpha$ -MCA | 1000 | 500  | 250 | 125 | 62.5 | 31.25 | 12.5 | 6.25 | 3.125 | 1.25 |
| THCA             | 400  | 200  | 100 | 50  | 25   | 12.5  | 5    | 2.5  | 1.25  | 0.5  |
| T- $\beta$ -MCA  | 1000 | 500  | 250 | 125 | 62.5 | 31.25 | 12.5 | 6.25 | 3.125 | 1.25 |
| CDCA-G           | 3200 | 1600 | 800 | 400 | 200  | 100   | 40   | 20   | 10    | 5    |
| GUCA             | 200  | 100  | 50  | 25  | 20   | 10    | 5    | 2.5  | 2     | 1    |

**Supplementary Table 3 Detailed Information of Each Bile Acid**

| Name      | Full Name              | CAS #       | Supplier # | InChI Key                   | Retention Time (min) | Precursor Ion | Product Ion |
|-----------|------------------------|-------------|------------|-----------------------------|----------------------|---------------|-------------|
| alloLCA   | Allolithocholic acid   | 2276-93-9   | B27763     | SMEROWZSTRWXGI-NWFSOCSA-N   | 29.92                | 375.145       | 375.145     |
| LCA       | Lithocholic acid       | 434-13-9    | B28100     | SMEROWZSTRWXGI-HVATVPOCSA-N | 31.92                | 375.3         | 375.3       |
| isoLCA    | Isolithocholic acid    | 1534-35-6   | B65766     | SMEROWZSTRWXGI-WFVDQZAMSA-N | 30.32                | 375.301       | 375.301     |
| NorDCA    | 23-Nordeoxycholic acid | 53608-86-9  | B74559     | PLRQOCVIINWCFA-AHFDLSHQSA-N | 24.36                | 377.3         | 377.3       |
| 6-ketoLCA | 6-ketolithocholic acid | 106439-47-8 | B79566     | JWZBXXZZDYMDCI-IJPFKRJSSA-N | 28.99                | 389.238       | 389.238     |

|                |                                 |            |        |                              |       |         |         |
|----------------|---------------------------------|------------|--------|------------------------------|-------|---------|---------|
| 12-ketoLCA     | 12-ketolithocholic acid         | 5130-29-0  | S22145 | CVNYHSDFZXHMMJ-VPUMZWJWSA-N  | 24.42 | 389.301 | 389.301 |
| 7-ketoLCA      | 7-ketolithocholic acid          | 4651-67-6  | B26465 | DXOCDBGWDZAYRQ-AURDAFMXSA-N  | 23.79 | 389.302 | 389.302 |
| $\beta$ -UDCA  | 3 $\beta$ -Ursodeoxycholic acid | 78919-26-3 | B72964 | RUDATBOHQWOJDD-YAKZLEHISA-N  | 19.65 | 391.254 | 391.254 |
| DCA            | Deoxycholic acid                | 83-44-3    | B21032 | KXGVEGMKQFWNSR-LLQZFEROSA-N  | 27.32 | 391.3   | 391.3   |
| CDCA           | Chenodeoxycholic acid           | 474-25-9   | B20347 | RUDATBOHQWOJDD-BSWAIDMHTSA-N | 26.69 | 391.301 | 391.301 |
| UDCA           | Ursodeoxycholic acid            | 128-13-2   | B21405 | RUDATBOHQWOJDD-UZVSRGJWSA-N  | 21.43 | 391.302 | 391.302 |
| HDCA           | Hyodeoxycholic acid             | 83-49-8    | B21672 | DGABKXLVXPYZII-SIBKNCMHSA-N  | 21.83 | 391.303 | 391.303 |
| NorCA          | Norcholeic acid                 | 60696-62-0 | B74560 | SHUYNJFEXPRUGR-RTCCEZQESA-N  | 15.95 | 393.211 | 329.1   |
| DHCA           | Dehydrocholic acid              | 81-23-2    | B24725 | OHXPGWVPLFPUSM-KLRNGDHRSA-N  | 13.78 | 401.2   | 401.2   |
| 7,12-diketoLCA | 7,12-diketolithocholic acid     | 517-33-9   | B27766 | MAFJMPFLJJCSTB-FQBQTYDJSA-N  | 13.16 | 403.14  | 403.14  |
| 6,7-diketoLCA  | 6,7-diketolithocholic acid      | N/A        | S40141 | FRIRHJVKXFYECW-ZTERCDMUSA-N  | 23.95 | 403.3   | 403.3   |
| $\alpha$ -MCA  | $\alpha$ -Muricholic acid       | 2393-58-0  | S22142 | DKPMWHFRUGMUKF-GDYCBZMLSA-N  | 15.68 | 407.3   | 407.3   |
| UCA            | Ursocholic acid                 | 2955-27-3  | B22360 | BHQCQFFYRZLCQQ-UTLSPDKDSA-N  | 12.64 | 407.301 | 407.301 |

|              |                                        |             |        |                              |       |         |         |
|--------------|----------------------------------------|-------------|--------|------------------------------|-------|---------|---------|
| $\beta$ -MCA | $\beta$ -Muricholic acid               | 2393-59-1   | B74541 | DKPMWHFRUGMUKF-CRKPLTDNSA-N  | 16.46 | 407.302 | 407.302 |
| CA           | Cholic acid                            | 81-25-4     | B20274 | BHQCQFFYRZLCQQ-OELDTZBJSA-N  | 20.81 | 407.303 | 407.303 |
| ACA          | Allocholic acid                        | 2464-18-8   | B22337 | BHQCQFFYRZLCQQ-PGHAKIONSA-N  | 20.33 | 407.304 | 407.304 |
| $\beta$ CA   | $3\beta$ -Cholic acid                  | 3338-16-7   | T51018 | BHQCQFFYRZLCQQ-UXWVVXDJSA-N  | 15.13 | 407.362 | 407.362 |
| GLCA         | Glycolithocholic acid Sodium Salt      | 24404-83-9  | B74545 | LQKBJAKZKFBLIB-LGURPPGFSA-M  | 27.83 | 432.401 | 73.9    |
| GHDCA        | Glycohyodeoxycholic acid               | 13042-33-6  | B27133 | SPOIYSFQOFYOFZ-BRDORRHWSA-N  | 15.28 | 448.2   | 74      |
| GCDCA        | Glycochenodeoxycholic acid Sodium Salt | 16564-43-5  | S31335 | AAAYACJGHNRICT-YRJJIGPTSA-M  | 21.59 | 448.276 | 73.9    |
| GUDCA        | Glycoursodeoxycholic acid              | 64480-66-6  | B32965 | GHCZAUBVMUEKKP-XROMFQGDSA-N  | 15    | 448.277 | 73.9    |
| GDCA         | Glycodeoxycholic acid Sodium Salt      | 16409-34-0  | B27134 | VMSNAUA EKXEYGP-YEUHZSMFSA-M | 22.63 | 448.279 | 73.9    |
| LCA-3S       | Lithocholic acid 3-sulfate             | 64936-81-8  | T70708 | AXDXVEYHEODSPN-HVATVPOCSA-N  | 26.59 | 455.196 | 96.9    |
| GCA          | Sodium Glycocholate Hydrate            | 338950-81-5 | S31334 | YWROUPFMHKARON-HJRQWJHVSA-M  | 15.27 | 464.281 | 73.9    |
| TLCA         | Taurolithocholic acid Sodium Salt      | 6042-32-6   | S26225 | YAERYJYXPRIDTO-HRHHVWJRSA-M  | 24.72 | 482.223 | 80      |
| THDCA        | Taurohyodeoxycholic Acid               | 110026-03-4 | B27364 | HMXPOCDLAFANT-BHYUGXBJSAN    | 12.22 | 498.224 | 79.9    |

|                  |                                                       |             |         |                             |       |         |       |
|------------------|-------------------------------------------------------|-------------|---------|-----------------------------|-------|---------|-------|
| TUDCA            | Tauroursodeoxycholic Acid                             | 14605-22-2  | B20921  | BHTRKEVKTCKXOH-LBSADWJPSA-N | 12.22 | 498.25  | 80    |
| TDCA             | Taurodeoxycholic acid Sodium Salt                     | 1180-95-6   | S30708  | YXHRQQJFKOHLAP-FVCKGWAHSA-M | 19.1  | 498.35  | 79.8  |
| TCDC             | Taurochenodeoxycholic acid                            | 516-35-8    | B20919  | BHTRKEVKTCKXOH-BJLOMENOSA-N | 17.68 | 498.357 | 79.8  |
| TCA              | Taurocholic acid Sodium Salt                          | 145-42-6    | B20918  | JAJWGBVLPIOOH-QGRZANFFSA-M  | 12.9  | 514.332 | 79.8  |
| T- $\alpha$ -MCA | Tauro- $\alpha$ -muricholic acid                      | 25613-05-2  | B74540  | XSOLDPYUICCHJX-UHFFFAOYSA-N | 7.41  | 514.337 | 79.9  |
| THCA             | Taurohyocholic acid                                   | 32747-07-2  | YY80220 | XSOLDPYUICCHJX-QZEPYOAJSA-N | 10.25 | 514.343 | 79.9  |
| T- $\beta$ -MCA  | Tauro- $\beta$ -muricholic acid                       | 25696-60-0  | B27767  | XSOLDPYUICCHJX-OEYGYFRSSA-N | 7.74  | 514.346 | 79.9  |
| CDCA-G           | Chenodeoxycholic acid 24-Acyl- $\beta$ -D-glucuronide | 208038-27-1 | T48407  | ZTJBLIAPAIPNJE-BWGRGVIUSA-N | 20.33 | 567.525 | 391.1 |
| GUCA             | Glycoursocholic acid                                  | 95093-95-1  | YY91138 | RFDAIACWWDREDC-IFZPJRIXSA-N | 36.74 | 416.2   | 73.9  |
